# Supplementary material for: Compositionally distinct nuclear pore complexes of functionally distinct dimorphic nuclei in the ciliate Tetrahymena
Source: Oxford University Press journal article supplement (doi:10.1242/jcs.199398), 2017-04-06
Supplement: jcs199398supp.pdf [file jcs199398supp.pdf]

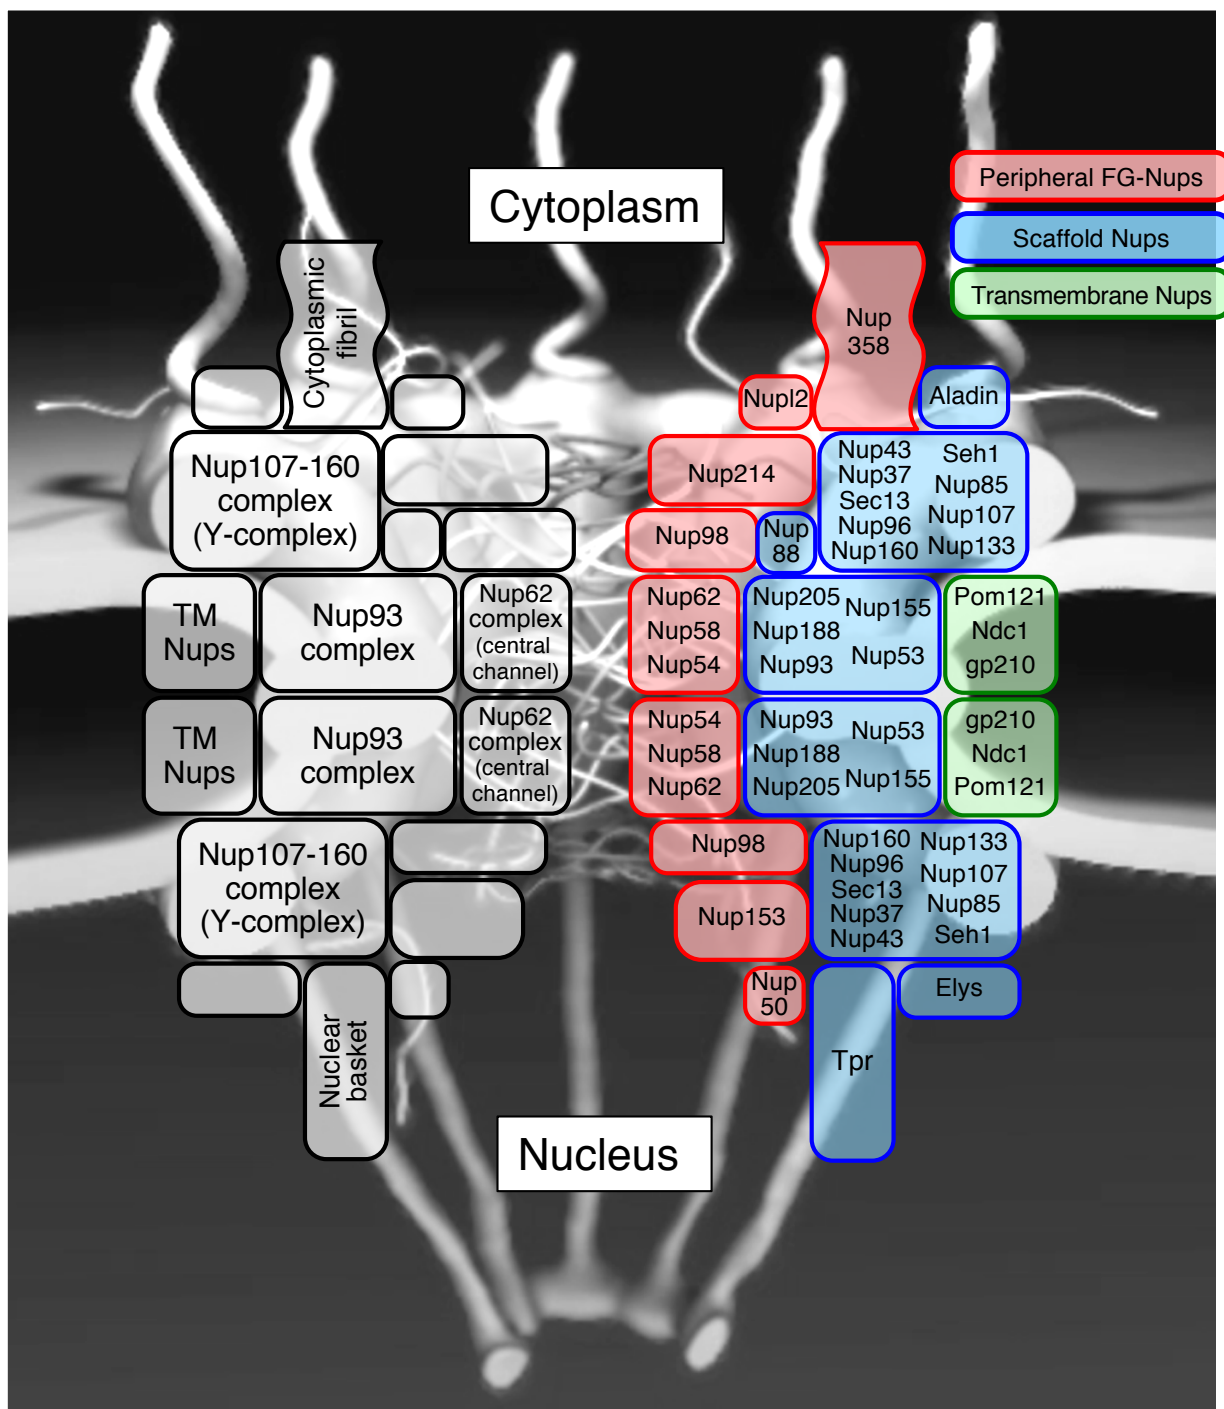

**Fig. S1. A general model of the position and components of the major Nup subcomplex in human cells.** The left half represents the position of the major subcomplex, and the right part represents the components contained in each subcomplex. Each box represents a subcomplex. Red, blue, and green boxes represent subcomplexes containing peripheral FG-, scaffold, and transmembrane Nups, respectively.

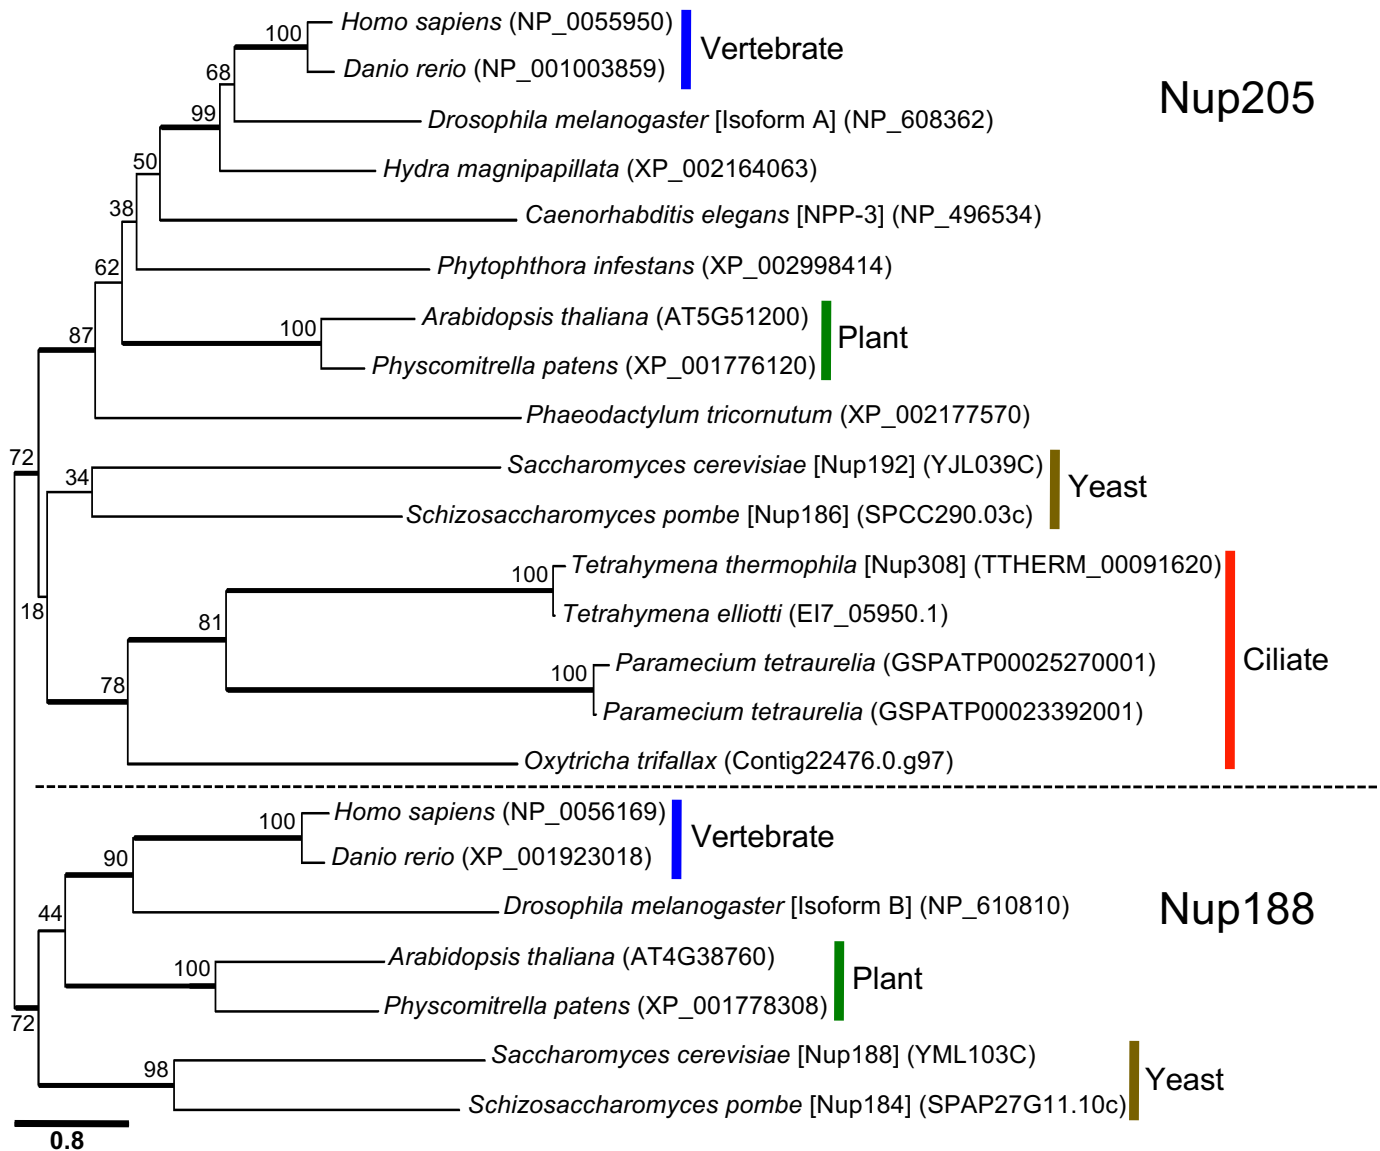

**Fig. S2. Molecular phylogenetic tree of ciliate Nup308 with Nup205 and Nup188 family proteins.** The amino acid sequences of the assumed orthologs of Nup205 and Nup188 were obtained from Genbank or the databases for each species. Accession numbers of the proteins are shown in parentheses. The sequences were aligned using Muscle in the MEGA 5.0.5 suite (Tamura, K. et al., *Mol. Biol. Evol.* 28, 2731-2739, 2011). All gap regions in the alignments were eliminated for phylogenetic tree reconstruction. The best substitution model and optional parameters were evaluated with Aminosan (Tanabe, A. S., *Mol. Ecol. Resour.* 11, 914-921, 2011) equipped with Treefinder (Jobb, G. et al., *BMC Evol. Biol.* 4, 18, 2004). The maximum likelihood phylogenetic relationships were reconstructed with RAxML (Ver. 7.3.0) (Stamatakis, *Bioinformatics*, 22, 2688-2690, 2006). To evaluate the bootstrap values, 1,000 replicated trees were reconstructed with the same model as performed in the original analyses. The bootstrap values are presented on every node. Bar represents expected amino acid residue substitutions per site.

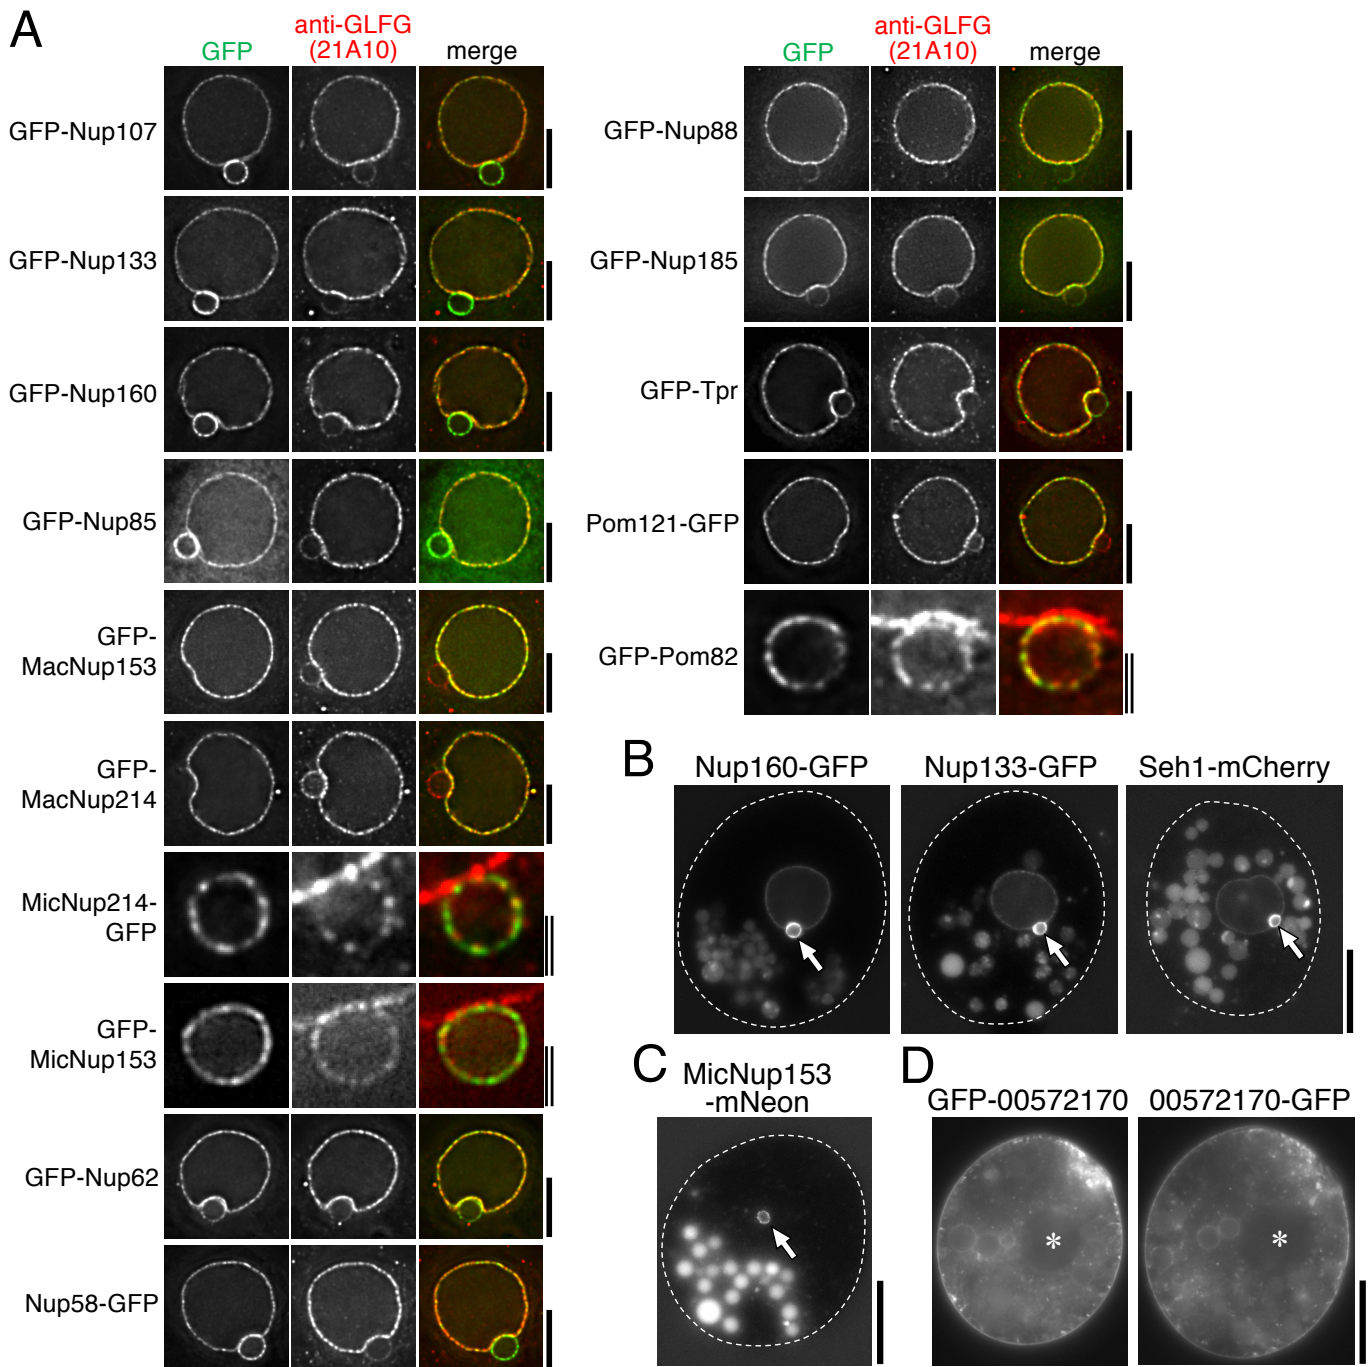

**Fig. S3. Localization of *Tetrahymena* Nups tagged with fluorescent proteins.** (A) Co-localization of fluorescent protein-tagged Nups with known GLFG-repeat-bearing Nups. The cells expressing GFP-tagged Nups were subjected to immunofluorescence staining using anti-GLFG antibody 21A10 that recognizes mainly MacNup98A localized to the MAC and secondarily some other components localized to the MIC NPC (Iwamoto et al., 2013). The images show GFP-tagged Nups (left panels), known Nups stained with anti-GLFG antibody (middle panels), and merged (right panels; GFP in green and anti-GLFG in red). The MAC and MIC regions are indicated for each Nup except for MicNup214-GFP, GFP-MicNup153, and GFP-Pom82, in which only MICs were indicated as enlarged images. Single lined bars, 5  $\mu$ m; double lined bars, 2  $\mu$ m. (B) Images show localization of endogenously GFP-tagged Nups at the C-termini expressed under the control of their native promoters (see Materials and Methods).

White broken lines represent the borders of cells. Arrows indicate the position of the MIC. Bar, 20  $\mu\text{m}$ . (C) The image shows the localization of MicNup153, tagged with mNeon at its C-terminus, expressed under the control of its native promoter. An arrow indicates the position of the MIC. (D) The Ndc1-like protein TTHERM\_00572170 tagged with GFP at the N- (GFP-00572170) or C-termini (00572170-GFP) was expressed under over expression condition. Asterisks show the position of the MAC. Bar, 20  $\mu\text{m}$ .

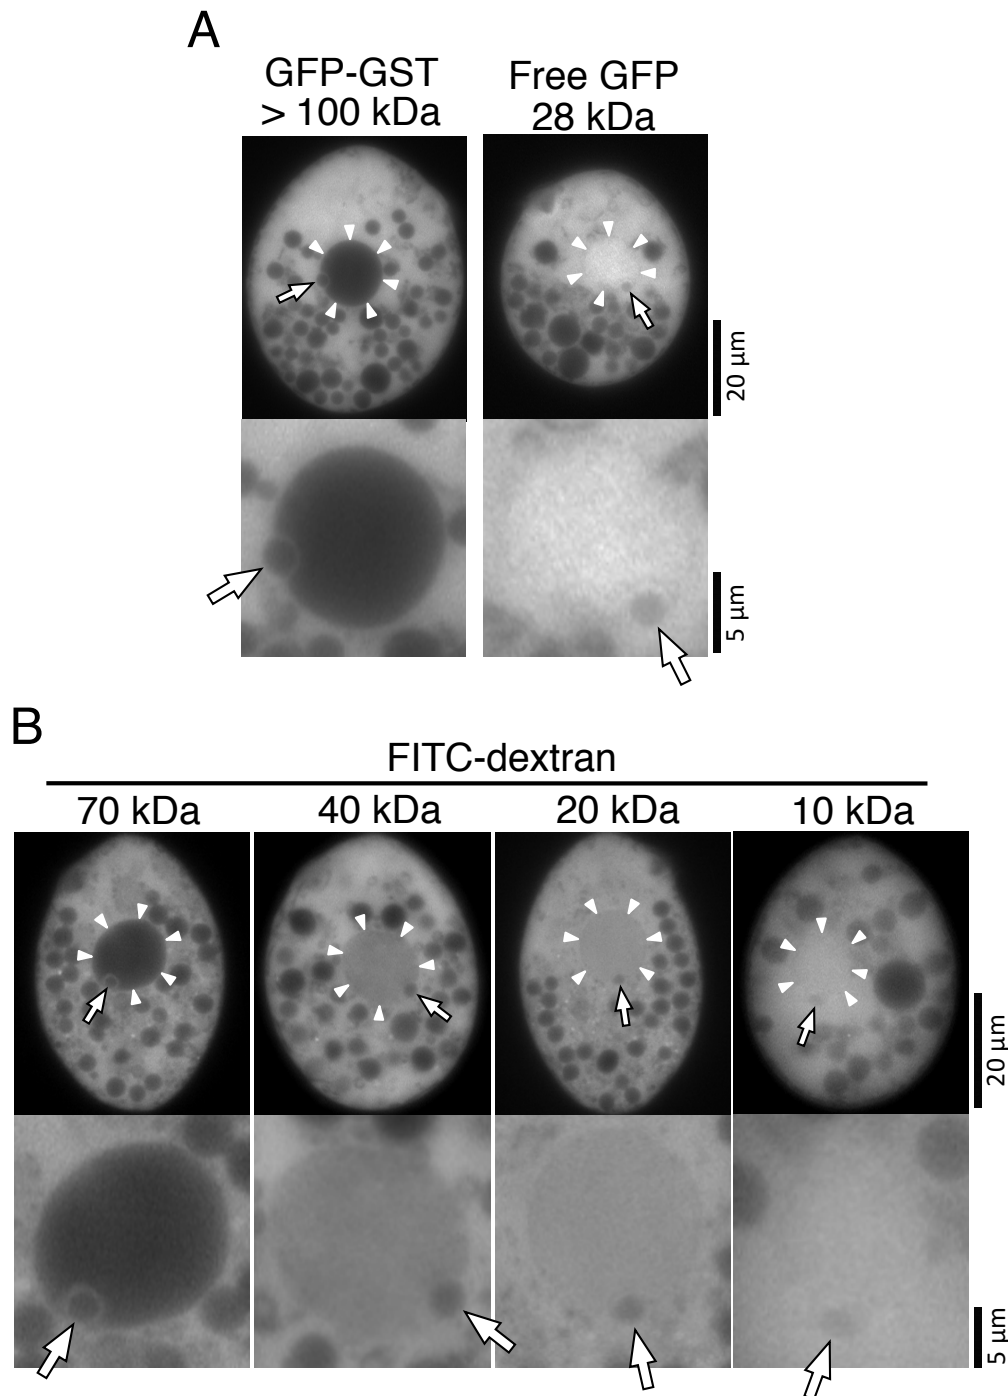

**Fig. S4. MAC and MIC exhibit different exclusion sizes regarding nuclear pore permeability.** (A) A living *T. thermophila* cell expressing GFP-GST or free GFP is shown in each upper panel. Nuclear regions are enlarged in the lower panels. White triangles indicate the edge of the MAC, and arrows indicate the position of the MIC. (B) Living *T. thermophila* cells into which FITC-dextran of various molecular weights was introduced. The cells were suspended in FITC-dextran (70, 40, 20, or 10 kDa) dissolved at 10 mg/ml in 10 mM Tris-HCl (pH 7.5). Then, the cell suspension was subjected to electroporation at a voltage of 0.1 kV with a capacitance of 0.05 mF. After electroporation, cells were incubated for 30 min at room temperature, and washed with 10 mM Tris-HCl (pH 7.5) three times. The cells were observed by a DeltaVision fluorescence microscopy system as described in Materials and methods. Similar results were obtained in all of three replicated experiments. Typical cells were presented from several hundred cells exhibiting similar nuclear/cytoplasmic fluorescence distribution.



**Table S1. Nuclear pore complex proteins of *T. thermophila* and other species**

| <i>Tetrahymena thermophila</i>                                                                                                                         | <i>Trypanosoma brucei</i>      | <i>S. cerevisiae</i>       | <i>S. pombe</i> | <i>H. sapiens</i> | <i>A. thaliana</i> |
|--------------------------------------------------------------------------------------------------------------------------------------------------------|--------------------------------|----------------------------|-----------------|-------------------|--------------------|
| --                                                                                                                                                     | --                             | --                         | --              | Nup358/RanBP2     | --                 |
| <b>MacNup214 (TTHERM_00755929)</b><br><b>MicNup214 (TTHERM_00992810)</b>                                                                               | TbNup149, TbNup140             | Nup159                     | Nup146          | Nup214/CAN        | Nup214             |
| <b>Nup88 (TTHERM_00455610)</b>                                                                                                                         | TbNup76                        | Nup82                      | Nup82           | Nup88             | Nup88              |
| --                                                                                                                                                     | --                             | Gle1                       | Gle1            | GLE1              | GLE1               |
| --                                                                                                                                                     | --                             | Nup42/Rip1                 | Amo1            | hCG1              | CG1                |
| <b>MacNup98A (TTHERM_00071070)</b><br><b>MacNup98B (TTHERM_000293459)</b><br><b>MicNup98A (TTHERM_01080600)</b><br><b>MicNup98B (TTHERM_00530720N)</b> | TbNup158                       | Nup145N,<br>Nup116, Nup100 | Nup189N         | Nup98             | Nup98a, Nup98b     |
| --                                                                                                                                                     | --                             | Gle2                       | Rae1            | RAE1              | RAE1               |
| <b>Nup160 (TTHERM_00445990)</b>                                                                                                                        | TbNup152                       | Nup120                     | Nup120          | Nup160            | Nup160             |
| <b>Nup133 (TTHERM_00486439)</b>                                                                                                                        | TbNup132, TbNup109             | Nup133                     | Nup132, Nup133  | Nup133            | Nup133             |
| <b>Nup107 (TTHERM_00037020)</b>                                                                                                                        | TbNup89                        | Nup84                      | Nup107          | Nup107            | Nup107             |
| Nup96 (TTHERM_00530720C)                                                                                                                               | TbNup158                       | Nup145C                    | Nup189C         | Nup96             | Nup96              |
| <b>Nup85 (TTHERM_01028760)</b>                                                                                                                         | TbNup82                        | Nup85                      | Nup85           | Nup85             | Nup75              |
| Seh1 (TTHERM_00954180)                                                                                                                                 | --                             | Seh1                       | Seh1            | Seh1              | Seh1               |
| Sec13 (TTHERM_00194320)                                                                                                                                | TbSec13                        | Sec13                      | (Sec13)         | Sec13             | Sec13              |
| --                                                                                                                                                     | --                             | --                         | Nup37           | Nup37             | --                 |
| --                                                                                                                                                     | TbNup41                        | --                         | --              | Nup43             | Nup43              |
| Nup308 (TTHERM_00091620)                                                                                                                               | TbNup225, TbNup181             | Nup192                     | Nup186          | Nup205            | Nup205             |
|                                                                                                                                                        |                                | Nup188                     | Nup184          | Nup188            | --                 |
| Nup155 (TTHERM_00760460)                                                                                                                               | TbNup144, TbNup119             | Nup170, Nup157             | Nup155          | Nup155            | Nup155             |
| <b>Nup185 (TTHERM_00755920)</b>                                                                                                                        |                                |                            |                 |                   |                    |
| Nup93 (TTHERM_00622800)                                                                                                                                | TbNup96                        | Nic96                      | Nup97, Npp106   | Nup93             | Nup93a, Nup93b     |
| --                                                                                                                                                     | TbNup65                        | Nup53, Nup59               | Nup40           | Nup53/MP-44       | Nup35              |
| <b>Nup62 (TTHERM_01122680)</b>                                                                                                                         | TbNup62, TbNup53a,<br>TbNup53b | Nsp1                       | Nsp1            | Nup62             | Nup62              |
| <b>Nup58 (TTHERM_00194800)</b>                                                                                                                         |                                | Nup49                      | Nup45           | Nup58             | Nup58              |
| Nup54 (TTHERM_00189060)                                                                                                                                |                                | Nup57                      | Nup44           | Nup54             | Nup54              |
| <b>MacNup153 (TTHERM_00379010)</b><br><b>MicNup153 (TTHERM_00647510)</b>                                                                               | TbNup98(?)                     | Nup1                       | Nup124          | Nup153            | Nup136             |
| Nup50 (TTHERM_00260700)                                                                                                                                | TbNup64(?), TbNup75(?)         | Nup2                       | Nup61           | Nup50             | Nup50a, Nup50b     |
| --                                                                                                                                                     | --                             | Nup60                      | Nup60           | --                | --                 |
| <b>Tpr (TTHERM_00268040)</b>                                                                                                                           | TbNup110, TbNup92              | Mlp1, Mlp2                 | Nup211          | TPR               | Tpr/NUA            |
| <b>(Ndc1 (TTHERM_00572170))</b>                                                                                                                        | --                             | Ndc1                       | Cut11           | NDC1              | --                 |
| <b>Pom121 (TTHERM_00312730)</b>                                                                                                                        | --                             | --                         | --              | POM121            | --                 |
| <b>Pom82 (TTHERM_00375160)</b>                                                                                                                         | --                             | --                         | --              | --                | --                 |
| gp210 (TTHERM_00101160)                                                                                                                                | --                             | Pom152                     | Pom152          | GP210/Nup210      | gp210              |
| --                                                                                                                                                     | --                             | Pom34                      | Pom34/Mug31     | --                | --                 |
| --                                                                                                                                                     | --                             | --                         | Ely5            | ELYS              | (Elys/HOS1)        |
| --                                                                                                                                                     | TbNup48                        | --                         | --              | Aladin            | ALADIN             |

*Tetrahymena* Nups shown in bold letters are those newly found in this study. Red and blue indicate MAC- and MIC-specific Nups, respectively. A question mark in parentheses indicates an unclear classification. Nup names in parentheses indicate that their NPC localization has not been experimentally confirmed. Two names shown with a slash represent synonyms. Nups of *T. brucei*, *S. cerevisiae*, *S. pombe*, *H. sapiens*, and *A. thaliana* are from the work of Obado et al. (PLOS Biol. 14, e1002365, 2016), Rout et al. (J. Cell Biol. 148, 635-651, 2000), Asakawa et al. (Nucleus 5, 149-162, 2014), Cronshaw et al. (J. Cell Biol. 158, 915-927, 2002), and Tamura et al. (Plant Cell 22, 4084-4097, 2010), respectively. .

**Table S2. Proteins identified in co-precipitates with GFP-Nup93**

| #  | Identified Proteins                                   | Gene Model Identifier | Molecular Weight | Number of assigned spectra |           |
|----|-------------------------------------------------------|-----------------------|------------------|----------------------------|-----------|
|    |                                                       |                       |                  | GFP control                | GFP-Nup93 |
| 1  | Nup308                                                | TTHERM_00091620       | 308 kDa          | 0                          | 54        |
| 2  | Nup93 (bait)                                          | TTHERM_00622800       | 113 kDa          | 0                          | 14        |
| 3  | hypothetical protein                                  | TTHERM_00471040       | 126 kDa          | 1                          | 9         |
| 4  | tubulin/FtsZ family, GTPase domain protein            | TTHERM_00558620       | 50 kDa           | 0                          | 8         |
| 5  | Nup58                                                 | TTHERM_00194800       | 45 kDa           | 0                          | 8         |
| 6  | tRNA pseudouridine synthase                           | TTHERM_00095540       | 48 kDa           | 0                          | 6         |
| 7  | hypothetical protein                                  | TTHERM_00148720       | 17 kDa           | 0                          | 6         |
| 8  | translation elongation factor EF-1alpha               | TTHERM_00655820       | 48 kDa           | 0                          | 4         |
| 9  | hypothetical protein                                  | TTHERM_00473020       | 48 kDa           | 0                          | 4         |
| 10 | ATP synthase F1, beta subunit                         | TTHERM_00585260       | 53 kDa           | 0                          | 4         |
| 11 | catalase heme-binding enzyme                          | TTHERM_01146030       | 56 kDa           | 0                          | 3         |
| 12 | Sm protein                                            | TTHERM_00549650       | 86 kDa           | 0                          | 2         |
| 13 | hypothetical protein                                  | TTHERM_00558350       | 35 kDa           | 0                          | 2         |
| 14 | carboxy-terminal crystallin fold protein 7p, putative | TTHERM_00516380       | 42 kDa           | 0                          | 2         |

**Table S3. Proteins identified in co-precipitates with GFP-Seh1**

| #  | Identified Proteins                        | Gene Model Identifier | Molecular Weight | Number of assigned spectra |          |
|----|--------------------------------------------|-----------------------|------------------|----------------------------|----------|
|    |                                            |                       |                  | GFP control                | GFP-Seh1 |
| 1  | splicing factor 3B subunit 3               | TTHERM_00530350       | 135 kDa          | 0                          | 4        |
| 2  | Sm protein                                 | TTHERM_00549650       | 86 kDa           | 0                          | 3        |
| 3  | Pre-mRNA-splicing factor prp46             | TTHERM_00684450       | 63 kDa           | 0                          | 3        |
| 4  | Nup85                                      | TTHERM_01028760       | 86 kDa           | 0                          | 3        |
| 5  | small nuclear ribonucleoprotein            | TTHERM_01403810       | 12 kDa           | 0                          | 3        |
| 6  | WD domain, G-beta repeat protein           | TTHERM_00494570       | 70 kDa           | 0                          | 3        |
| 7  | patatin family phospholipase               | TTHERM_00227880       | 41 kDa           | 0                          | 2        |
| 8  | Seh1 (bait)                                | TTHERM_00954180       | 42 kDa           | 0                          | 2        |
| 9  | peptidyl-prolyl cis-trans isomerase        | TTHERM_00051740       | 20 kDa           | 0                          | 2        |
| 10 | hypothetical protein                       | TTHERM_00558350       | 35 kDa           | 0                          | 2        |
| 11 | G-quartet DNA-binding protein, putative    | TTHERM_00499440       | 41 kDa           | 0                          | 2        |
| 12 | U2 snRNP auxilliary splicing factor        | TTHERM_00525150       | 56 kDa           | 0                          | 2        |
| 13 | small nuclear ribonucleoprotein            | TTHERM_00467959       | 11 kDa           | 0                          | 2        |
| 14 | squalene-tetrahymanol cyclase              | TTHERM_01008630       | 76 kDa           | 0                          | 2        |
| 15 | hypothetical protein                       | TTHERM_00148720       | 17 kDa           | 0                          | 2        |
| 16 | surp module family protein                 | TTHERM_00013750       | 69 kDa           | 0                          | 2        |
| 17 | high mobility group (HMG) box protein      | TTHERM_00660180       | 16 kDa           | 0                          | 2        |
| 18 | histone H4                                 | TTHERM_00189170       | 11 kDa           | 0                          | 1        |
| 19 | tubulin/FtsZ family, GTPase domain protein | TTHERM_00558620       | 50 kDa           | 0                          | 1        |
| 20 | histone H2A                                | TTHERM_00790790       | 15 kDa           | 0                          | 1        |
| 21 | zinc knuckle protein                       | TTHERM_00444570       | 77 kDa           | 0                          | 1        |
| 22 | CC1 family splicing factor                 | TTHERM_00101150       | 61 kDa           | 0                          | 1        |
| 23 | hypothetical protein                       | TTHERM_00777260       | 35 kDa           | 0                          | 1        |
| 24 | SKIP/SNW domain protein                    | TTHERM_00942990       | 50 kDa           | 0                          | 1        |
| 25 | ISY1-like splicing family protein          | TTHERM_00588910       | 38 kDa           | 0                          | 1        |
| 26 | amylo-alpha-1,6-glucosidase family protein | TTHERM_00128330       | 183 kDa          | 0                          | 1        |
| 27 | C2 domain protein                          | TTHERM_00225860       | 33 kDa           | 0                          | 1        |
| 28 | gp210                                      | TTHERM_00101160       | 219 kDa          | 0                          | 1        |
| 29 | transmembrane protein, putative            | TTHERM_00171720       | 85 kDa           | 0                          | 1        |
| 30 | granule lattice protein                    | TTHERM_00624730       | 41 kDa           | 0                          | 1        |
| 31 | transmembrane protein, putative            | TTHERM_00242460       | 102 kDa          | 0                          | 1        |
| 32 | DnaJ carboxy-terminal domain protein       | TTHERM_00101330       | 42 kDa           | 0                          | 1        |



**Table S4. Proteins identified in co-precipitates with GFP-Nup85**

| #  | Identified Proteins                                                | Gene Model Identifier | Molecular Weight | Number of assigned spectra |           |
|----|--------------------------------------------------------------------|-----------------------|------------------|----------------------------|-----------|
|    |                                                                    |                       |                  | GFP control                | GFP-Nup85 |
| 1  | Nup85 (bait)                                                       | TTHERM_01028760       | 86 kDa           | 0                          | 240       |
| 2  | hypothetical protein                                               | TTHERM_00530680       | 220 kDa          | 0                          | 145       |
| 3  | hypothetical protein                                               | TTHERM_00565630       | 258 kDa          | 0                          | 78        |
| 4  | Seh1                                                               | TTHERM_00954180       | 42 kDa           | 0                          | 35        |
| 5  | Nup160                                                             | TTHERM_00445990       | 177 kDa          | 0                          | 16        |
| 6  | 40S ribosomal protein S5                                           | TTHERM_01386050       | 22 kDa           | 0                          | 11        |
| 7  | MicNup98B-Nup96                                                    | TTHERM_00530720       | 233 kDa          | 0                          | 10        |
| 8  | 6-phosphofructokinase                                              | TTHERM_00170320       | 60 kDa           | 0                          | 10        |
| 9  | transmembrane protein, putative                                    | TTHERM_00532090       | 35 kDa           | 0                          | 9         |
| 10 | phosphate carrier protein                                          | TTHERM_00535740       | 33 kDa           | 0                          | 8         |
| 11 | polyubiquitin                                                      | TTHERM_00346530       | 62 kDa           | 0                          | 7         |
| 12 | eukaryotic porin protein                                           | TTHERM_00312720       | 41 kDa           | 0                          | 7         |
| 13 | Nup133                                                             | TTHERM_00486439       | 125 kDa          | 0                          | 6         |
| 14 | phosphoribosylaminoimidazole synthetase protein                    | TTHERM_00548120       | 37 kDa           | 0                          | 6         |
| 15 | 6-phosphofructokinase                                              | TTHERM_00338460       | 61 kDa           | 0                          | 6         |
| 16 | 40S ribosomal protein S11, putative                                | TTHERM_01109770       | 18 kDa           | 0                          | 5         |
| 17 | 40S ribosomal protein S2, putative                                 | TTHERM_00193740       | 34 kDa           | 0                          | 5         |
| 18 | acetyl-CoA acyltransferase                                         | TTHERM_00926980       | 56 kDa           | 0                          | 4         |
| 19 | ADP/ATP transporter on adenylate translocase                       | TTHERM_00052310       | 34 kDa           | 0                          | 4         |
| 20 | 40S ribosomal protein S20                                          | TTHERM_00992760       | 20 kDa           | 0                          | 4         |
| 21 | macronuclear actin                                                 | TTHERM_00190950       | 42 kDa           | 0                          | 4         |
| 22 | oxidoreductase, short chain dehydrogenase/reductase family protein | TTHERM_00024130       | 35 kDa           | 0                          | 4         |
| 23 | ribosomal protein S9                                               | TTHERM_00706300       | 26 kDa           | 0                          | 3         |
| 24 | 40S ribosomal protein S14                                          | TTHERM_00765300       | 16 kDa           | 0                          | 3         |
| 25 | hypothetical protein                                               | TTHERM_00991610       | 99 kDa           | 0                          | 3         |
| 26 | hypothetical protein                                               | TTHERM_00571650       | 36 kDa           | 0                          | 3         |
| 27 | acyltransferase                                                    | TTHERM_00285610       | 41 kDa           | 0                          | 3         |
| 28 | transmembrane protein, putative                                    | TTHERM_00885740       | 123 kDa          | 0                          | 3         |
| 29 | 6-phosphofructokinase                                              | TTHERM_00338470       | 74 kDa           | 0                          | 3         |
| 30 | eukaryotic porin protein                                           | TTHERM_00117590       | 35 kDa           | 0                          | 3         |
| 31 | Sec13                                                              | TTHERM_00194320       | 39 kDa           | 0                          | 2         |
| 32 | 40S ribosomal protein S24                                          | TTHERM_00467660       | 17 kDa           | 0                          | 2         |
| 33 | hypothetical protein                                               | TTHERM_00115400       | 131 kDa          | 0                          | 2         |
| 34 | 40S ribosomal protein S18, putative                                | TTHERM_00131110       | 18 kDa           | 0                          | 2         |
| 35 | transmembrane protein, putative                                    | TTHERM_00713350       | 11 kDa           | 0                          | 2         |
| 36 | Na,H/K antiporter P-type ATPase, alpha subunit family protein      | TTHERM_00049030       | 136 kDa          | 0                          | 2         |
| 37 | 60S ribosomal protein L28                                          | TTHERM_00487140       | 21 kDa           | 0                          | 2         |
| 38 | 3-hydroxyacyl-CoA dehydrogenase                                    | TTHERM_00666640       | 33 kDa           | 0                          | 2         |
| 39 | catalase heme-binding enzyme                                       | TTHERM_01146030       | 56 kDa           | 0                          | 2         |
| 40 | peptidase family S49 protein                                       | TTHERM_00406670       | 32 kDa           | 0                          | 2         |
| 41 | transmembrane protein, putative                                    | TTHERM_00127260       | 44 kDa           | 0                          | 2         |

**Table S5. Proteins identified in co-precipitates with GFP-Nup96.**

| #  | Identified Proteins                             | Gene Medel Identifier | Molecular Weight | Number of assigned spectra |           |
|----|-------------------------------------------------|-----------------------|------------------|----------------------------|-----------|
|    |                                                 |                       |                  | GFP control                | GFP-Nup96 |
| 1  | MicNup98B-Nup96 (bait)                          | TTHERM_00530720       | 233 kDa          | 0                          | 129       |
| 2  | Nup133                                          | TTHERM_00486439       | 125 kDa          | 0                          | 13        |
| 3  | Nup160                                          | TTHERM_00445990       | 177 kDa          | 0                          | 12        |
| 4  | Nup107                                          | TTHERM_00037020       | 109 kDa          | 0                          | 10        |
| 5  | Serine/Threonine kinase                         | TTHERM_00992980       | 98 kDa           | 0                          | 8         |
| 6  | Sec13                                           | TTHERM_00194320       | 39 kDa           | 0                          | 7         |
| 7  | D-hydantoinase family protein                   | TTHERM_00400750       | 112 kDa          | 0                          | 6         |
| 8  | gp210                                           | TTHERM_00101160       | 219 kDa          | 0                          | 5         |
| 9  | Nup85                                           | TTHERM_01028760       | 86 kDa           | 0                          | 4         |
| 10 | phosphoribosylaminoimidazole synthetase protein | TTHERM_00548120       | 37 kDa           | 0                          | 4         |
| 11 | 40S ribosomal protein S11, putative             | TTHERM_01109770       | 18 kDa           | 0                          | 3         |
| 12 | 40S ribosomal protein S2, putative              | TTHERM_00193740       | 34 kDa           | 0                          | 2         |
| 13 | ADP/ATP transporter on adenylate translocase    | TTHERM_00052310       | 34 kDa           | 0                          | 2         |
| 14 | AAA family ATPase                               | TTHERM_00295050       | 127 kDa          | 0                          | 2         |
| 15 | hypothetical protein                            | TTHERM_00613630       | 67 kDa           | 0                          | 2         |
| 16 | 60S ribosomal protein L5                        | TTHERM_00736480       | 34 kDa           | 0                          | 2         |

**Table S6. Proteins identified in co-precipitates with GFP-Nup185**

| #  | Identified Proteins                      | Gene Model Identifier | Molecular Weight | Number of assigned spectra |            |
|----|------------------------------------------|-----------------------|------------------|----------------------------|------------|
|    |                                          |                       |                  | GFP control                | GFP-Nup185 |
| 1  | Nup185 (bait)                            | TTHERM_00755920       | 185 kDa          | 0                          | 380        |
| 2  | Tpr                                      | TTHERM_00268040       | 165 kDa          | 0                          | 83         |
| 3  | gp210                                    | TTHERM_00101160       | 219 kDa          | 0                          | 18         |
| 4  | Serine/Threonine kinase                  | TTHERM_00992980       | 98 kDa           | 0                          | 8          |
| 5  | cyclic nucleotide-binding domain protein | TTHERM_00941370       | 148 kDa          | 0                          | 5          |
| 6  | hypothetical protein                     | TTHERM_00579030       | 117 kDa          | 0                          | 4          |
| 7  | acetyl-CoA acyltransferase               | TTHERM_00926980       | 56 kDa           | 0                          | 3          |
| 8  | polyubiquitin                            | TTHERM_00346530       | 62 kDa           | 0                          | 3          |
| 9  | 40S ribosomal protein S5                 | TTHERM_01386050       | 22 kDa           | 0                          | 2          |
| 10 | 40S ribosomal protein S2, putative       | TTHERM_00193740       | 34 kDa           | 0                          | 2          |
| 11 | D-hydantoinase family protein            | TTHERM_00400750       | 112 kDa          | 0                          | 2          |
| 12 | hypothetical protein                     | TTHERM_00661740       | 34 kDa           | 0                          | 2          |
| 13 | papain family cysteine protease          | TTHERM_00079610       | 37 kDa           | 0                          | 2          |
| 14 | peroxisomal 3-ketoacyl-CoA thiolase B    | TTHERM_00899460       | 44 kDa           | 0                          | 2          |
| 15 | hypothetical protein                     | TTHERM_01014740       | 16 kDa           | 0                          | 2          |
| 16 | hypothetical protein                     | TTHERM_00048950       | 120 kDa          | 0                          | 2          |
| 17 | thioredoxin-dependent peroxide reductase | TTHERM_00295170       | 30 kDa           | 0                          | 2          |
| 18 | SURF1 family protein                     | TTHERM_00338280       | 47 kDa           | 0                          | 2          |
| 19 | 50S ribosomal protein L4                 | TTHERM_00564280       | 42 kDa           | 0                          | 2          |
| 20 | hypothetical protein                     | TTHERM_00323030       | 66 kDa           | 0                          | 2          |
| 21 | cGMP-dependent kinase 5-1                | TTHERM_00046530       | 90 kDa           | 0                          | 2          |

**Table S7. Primers used in this study**

| Target                                       | Primer name          | Primer direction | Sequence (5'→3')                             |
|----------------------------------------------|----------------------|------------------|----------------------------------------------|
| Nup85 cDNA                                   | 01028760_F(XhoI)     | Fwd              | CGCTCGAGATGATACCTGAAAACAATAAC                |
|                                              | 01028760_R(ApaI)     | Rev              | CCGGGCCCTCATAATGTATAGCTGTTCATAAC             |
| Nup160 cDNA                                  | 00445990_F(XhoI)     | Fwd              | GGCTCGAGATGGATAAAATGATAGAAGAATAAATATAGG      |
|                                              | 00445990_R(ApaI)     | Rev              | CCGGGCCCTCATTCTACTTAAAATAGAGAAGC             |
| Nup133 cDNA                                  | 00486439_F(XhoI)     | Fwd              | GGCTCGAGATGGATTAAGCATATAAGCAG                |
|                                              | 00486439_R(ApaI)     | Rev              | CCGGGCCCTCAATTTGGAGAAAGTTTTTTTTTAGAAGTTGTC   |
| Nup107 cDNA                                  | 00037020_F(XhoI)     | Fwd              | GGCTCGAGATGTAGAAATTAGACGCTAACAAAGTG          |
|                                              | 00037020_R(ApaI)     | Rev              | CCGGGCCCTCATAAATTTAGTACAGTTCTC               |
| MicNup214 GFP-tagging 5' flanking sequence   | 186_5'/F(XbaI)       | Fwd              | CGTCTAGAACATTTAAAATTAATAACAGCAACC            |
|                                              | 186_5'/R(BamHI)      | Rev              | CCGGATCCTCCTTAATTCATATTACAATTTTTAG           |
| MicNup214 GFP-tagging 3' flanking sequence   | 186_3'/F(SalI)       | Fwd              | GCGTCGACTTAAATATGAAATATTCCATAAGG             |
|                                              | 186_3'/R(KpnI)       | Rev              | CCGGTACCATCGAAGGCATTATAAATCTATGTTCC          |
| MicNup153 mNeon-tagging 5' flanking sequence | 00647510_5FWD_SacI   | Fwd              | AGGGAACAAAAGCTGGAGCTCGTCTTTAACATCAAAGTAAGCTT |
|                                              | 00647510_5REV3_dSacl | Rev              | CGGCCGCCACCGCGGTGGCCTATTCTTTTACTGTTTTAATTATG |
| MicNup153 mNeon-tagging 3' flanking sequence | 00647510 3 FWD Xho   | Fwd              | TCGATACCGTCGACCTCGAGCACTATCCAAATTGATCATTGAT  |
|                                              | 00647510 3 REV Xho   | Rev              | GTACCGGGCCCCCCTCGAGCAGTAAAAGTAATCTTGAGGATAC  |
| MicNup153 cDNA                               | 93.m00153/F(XhoI)    | Fwd              | GGCTCGAGATGAACTAGGCATATTAGTATTC              |
|                                              | 93.m00153/R(ApaI)    | Rev              | GCGGGCCCTGACAAATCATATTCTTTTACTG              |
| MacNup214 cDNA                               | 00755920C_F(XhoI)    | Fwd              | CGCTCGAGATGTTCTCAAGTTAAGTATC                 |
|                                              | 00755920C_R(ApaI)    | Rev              | CCGGGCCCTCATTCTTGGTCTATAAAAAGC               |
| MacNup153 cDNA                               | 40.m00240/FWD/Xho    | Fwd              | GGCTCGAGATGGATAAGAATGGCTTTATAAAGCGTGACTTTGC  |
|                                              | 40.m00240/REV/Apa    | Rev              | CCGGGCCCTCAAATTCCTTGCTTGTTATTTGTATTTTTTTTC   |
| Nup62 cDNA                                   | 001122680_F(XhoI)    | Fwd              | GGCTCGAGATGTTCAATTAATAACAAGG                 |
|                                              | 001122690_R(ApaI)    | Rev              | GCGGGCCCTCAAATTTAGTCTGCAAC                   |
| Nup58 cDNA                                   | 00194800_F(XhoI)     | Fwd              | GGCTCGAGATGTCACTTTTTAATTAGAATTAAGGAG         |
|                                              | 00194800_R2(KpnI)    | Rev              | CCGGTACCTTAGATTCTTTTTTCGTTTGGTTGC            |
| Nup88 cDNA                                   | 00455610_F(XhoI)     | Fwd              | GGCTCGAGATGGAGAATAACCTTTTAGAATCAAG           |
|                                              | 00455610_R(ApaI)     | Rev              | CCGGGCCCTCAATTATCTTGAGGATTGGTTAAATGATC       |
| Nup185 cDNA                                  | 00755920N_F(XhoI)    | Fwd              | CGCTCGAGATGGAGAATTTAGAGAGTAC                 |
|                                              | 00755920N_R(ApaI)    | Rev              | GCGGGCCCTCAAAGTCTAATTAATAATATATGG            |
| Tpr cDNA                                     | 00268040_F(XhoI)     | Fwd              | CGCTCGAGATGGATAGCAATTAAGCCGCAGAC             |
|                                              | 00268040_R(ApaI)     | Rev              | CCGGGCCCTCAAATAAAAAGTCTAATCAAATCTTCG         |
| Pom121 cDNA                                  | 30.m00269/F(XhoI)    | Fwd              | CGCTCGAGATGGAAAATTAGCAAGTAC                  |
|                                              | 30.m00269/R(ApaI)    | Rev              | CCGGGCCCTCATTATGTAGCACTCTCTG                 |
|                                              | 30.m00269/R2(KpnI)   | Rev              | GCGGTACCTGATTATGTAGCACTCTCTG                 |
| Pom82 cDNA                                   | Pom82_F1(XhoI)       | Fwd              | ATCTCGAGATGAACGCCTAAAATAACAAC                |
|                                              | Pom82_R1(ApaI)       | Rev              | ATGGGCCCTCAGAAAAGCAATGAGCGGATT               |
| Pom82ΔTM cDNA                                | Pom82_R2(ApaI)       | Rev              | ATGGGCCCTCAAAGCATATTCTTTTCTTTAATAGATC        |
| THERM_00572170 (Ndc1-like)                   | 00572170_F2(XhoI)    | Fwd              | GGCTCGAGATGTTTGGTTAAGTTTAACTAAATAGC          |
|                                              | 00572170_R(KpnI)     | Rev              | CCGGTACCATTATTTTAGATTCACTTTTCAGCC            |
|                                              | 00572170_R2(ApaI)    | Rev              | CCGGGCCCTCAATTATTTTAGATTCACTTTTCAGCC         |
| Nup160 GFP-tagging 5' flanking sequence      | Nup160_5F(SacI)      | Fwd              | CCGAGCTCTCATGAAGATGATTTAGCAGAGC              |
|                                              | Nup160_5R(BamHI)     | Rev              | CCGGATCCTTCTACTTAAAATAGAGAAGCAATTTGC         |
| Nup160 GFP-tagging 3' flanking sequence      | Nup160_3F(SalI)      | Fwd              | CCGTCGACTAGAATGATTGGAAGTCCTCCAC              |
|                                              | Nup160_3R(KpnI)      | Rev              | CCGGTACCCTTCAATTGATTTATGTAGTAACC             |
| Nup133 GFP-tagging 5' flanking sequence      | Nup133_5F(SacI)      | Fwd              | CCGAGCTCATGTTTTAGAACGATGTGCTTAAATC           |
|                                              | Nup133_5R(BamHI)     | Rev              | CCGGATCCATTTGGAGAAAGTTTTTTTTTAGAAGTTGTC      |
| Nup133 GFP-tagging 3' flanking sequence      | Nup133_3F(SalI)      | Fwd              | GCGTCGACAATGTTAATATTTGTTAATCCAAG             |
|                                              | Nup133_3R(KpnI)      | Rev              | CCGGTACCCTTCTCTATTTAATGGAGATATC              |
| Seh1 mCherry-tagging 5' flanking sequence    | Seh1_5'/F(SacI)      | Fwd              | GCGAGCTCATACACGATATATCATTGACTG               |
|                                              | Seh1_5'/R(NheI)      | Rev              | CCGCTAGCTTATTATTCTGAATCCTAAGTTTC             |
| Seh1 mCherry-tagging 3' flanking sequence    | Seh1_3'/F(SalI)      | Fwd              | GCGTCGACATTGCATATTGAATGACTAACTG              |
|                                              | Seh1_3'/R(KpnI)      | Rev              | GCGGTACCTACGTACTTATTTACGTTATGCG              |
